# Supplementary material for: Immobilized TiO2 on glass spheres applied to heterogeneous photocatalysis: photoactivity, leaching and regeneration process
Source: PeerJ. 2018 Mar 6;6:e4464. doi: 10.7717/peerj.4464 (PMC5844248; doi:10.7717/peerj.4464)
Supplement: Data S1 [file peerj-06-4464-s002.xlsx]

## Sheet: Fig.3-XRD
	Experimental		Model
2 q	TiO2-P25	TiO2-400°C	TiO2-P25	TiO2-400°C
10	146	191	144.031	195.802
10.02	127	166	143.883	195.463
10.04	118	170	143.735	195.126
10.06	142	193	143.588	194.79
10.08	138	141	143.441	194.454
10.1	150	173	143.294	194.119
10.12	132	171	143.148	193.785
10.14	139	156	143.002	193.452
10.16	120	184	142.856	193.12
10.18	129	177	142.711	192.788
10.2	141	175	142.566	192.458
10.22	132	181	142.421	192.128
10.24	143	161	142.277	191.799
10.26	131	197	142.133	191.471
10.28	144	159	141.989	191.143
10.3	143	182	141.846	190.817
10.32	162	172	141.703	190.491
10.34	143	178	141.561	190.166
10.36	153	174	141.418	189.842
10.38	119	192	141.276	189.519
10.4	129	176	141.135	189.196
10.42	121	183	140.994	188.874
10.44	129	188	140.853	188.553
10.46	148	174	140.712	188.233
10.48	127	185	140.572	187.914
10.5	118	157	140.432	187.595
10.52	138	168	140.293	187.278
10.54	133	178	140.153	186.961
10.56	121	169	140.015	186.644
10.58	131	168	139.876	186.329
10.6	143	185	139.738	186.015
10.62	142	175	139.6	185.701
10.64	148	172	139.462	185.388
10.66	121	185	139.325	185.076
10.68	136	164	139.188	184.764
10.7	149	182	139.052	184.453
10.72	148	179	138.916	184.144
10.74	128	160	138.78	183.835
10.76	130	188	138.645	183.526
10.78	132	182	138.51	183.219
10.8	129	188	138.375	182.912
10.82	124	157	138.241	182.606
10.84	149	181	138.107	182.301
10.86	143	156	137.974	181.996
10.88	128	179	137.84	181.693
10.9	119	176	137.708	181.39
10.92	121	182	137.575	181.088
10.94	145	164	137.443	180.787
10.96	131	170	137.311	180.487
10.98	134	163	137.18	180.188
11	147	161	137.051	179.889
11.02	152	178	136.93	179.591
11.04	151	166	136.826	179.294
11.06	142	166	136.744	178.997
11.08	121	167	136.663	178.702
11.1	151	157	136.553	178.407
11.12	135	191	136.426	178.113
11.14	126	165	136.298	177.82
11.16	130	194	136.169	177.529
11.18	146	160	136.041	177.244
11.2	129	166	135.914	176.972
11.22	142	160	135.786	176.721
11.24	147	186	135.659	176.483
11.26	145	182	135.533	176.228
11.28	149	165	135.406	175.945
11.3	135	187	135.28	175.658
11.32	109	172	135.154	175.372
11.34	143	169	135.028	175.086
11.36	127	202	134.902	174.801
11.38	129	174	134.777	174.517
11.4	124	173	134.652	174.234
11.42	144	159	134.527	173.951
11.44	138	160	134.403	173.669
11.46	119	184	134.279	173.388
11.48	152	160	134.155	173.107
11.5	114	161	134.032	172.827
11.52	128	170	133.909	172.548
11.54	132	176	133.786	172.27
11.56	121	173	133.664	171.992
11.58	145	162	133.542	171.715
11.6	109	155	133.42	171.438
11.62	142	179	133.298	171.162
11.64	146	178	133.177	170.888
11.66	142	178	133.056	170.613
11.68	134	161	132.935	170.34
11.7	137	166	132.815	170.067
11.72	124	174	132.695	169.795
11.74	124	174	132.575	169.523
11.76	144	180	132.456	169.253
11.78	143	166	132.337	168.983
11.8	133	183	132.218	168.713
11.82	128	173	132.099	168.445
11.84	140	182	131.981	168.177
11.86	151	156	131.863	167.91
11.88	136	189	131.746	167.643
11.9	129	174	131.628	167.378
11.92	129	169	131.511	167.113
11.94	141	165	131.394	166.848
11.96	103	165	131.278	166.584
11.98	112	198	131.162	166.322
12	127	166	131.046	166.059
12.02	146	152	130.93	165.798
12.04	115	162	130.815	165.537
12.06	140	150	130.7	165.277
12.08	116	164	130.585	165.017
12.1	123	172	130.471	164.758
12.12	135	176	130.357	164.5
12.14	128	170	130.243	164.243
12.16	117	164	130.129	163.986
12.18	140	173	130.016	163.73
12.2	128	168	129.903	163.474
12.22	123	164	129.79	163.219
12.24	138	181	129.678	162.965
12.26	125	153	129.566	162.712
12.28	148	171	129.454	162.459
12.3	132	168	129.342	162.207
12.32	125	177	129.231	161.956
12.34	161	171	129.12	161.705
12.36	136	155	129.009	161.455
12.38	139	168	128.899	161.206
12.4	118	155	128.789	160.957
12.42	135	171	128.679	160.709
12.44	118	178	128.569	160.462
12.46	140	172	128.46	160.215
12.48	139	151	128.351	159.969
12.5	135	174	128.242	159.723
12.52	132	157	128.134	159.479
12.54	133	138	128.025	159.235
12.56	121	169	127.918	158.991
12.58	143	202	127.81	158.748
12.6	154	205	127.703	158.506
12.62	137	179	127.595	158.265
12.64	158	193	127.489	158.024
12.66	148	155	127.382	157.784
12.68	150	213	127.276	157.544
12.7	134	160	127.17	157.305
12.72	130	170	127.064	157.067
12.74	137	174	126.959	156.83
12.76	128	195	126.854	156.593
12.78	132	197	126.749	156.357
12.8	135	174	126.644	156.121
12.82	127	153	126.54	155.886
12.84	149	174	126.436	155.651
12.86	141	171	126.332	155.418
12.88	127	174	126.228	155.185
12.9	136	192	126.125	154.952
12.92	139	178	126.022	154.72
12.94	120	179	125.919	154.489
12.96	165	150	125.817	154.259
12.98	136	186	125.715	154.029
13	137	167	125.613	153.799
13.02	144	153	125.511	153.571
13.04	173	151	125.409	153.343
13.06	155	164	125.308	153.115
13.08	158	178	125.207	152.888
13.1	154	162	125.107	152.662
13.12	157	175	125.006	152.437
13.14	132	145	124.906	152.212
13.16	122	177	124.807	151.987
13.18	131	183	124.707	151.764
13.2	154	172	124.608	151.541
13.22	136	158	124.509	151.318
13.24	113	186	124.41	151.096
13.26	125	166	124.311	150.875
13.28	124	166	124.213	150.654
13.3	128	170	124.115	150.434
13.32	125	191	124.017	150.215
13.34	117	167	123.92	149.996
13.36	130	196	123.823	149.778
13.38	133	169	123.726	149.56
13.4	123	177	123.629	149.343
13.42	138	184	123.532	149.127
13.44	116	164	123.436	148.911
13.46	125	159	123.34	148.696
13.48	157	161	123.244	148.481
13.5	144	170	123.149	148.267
13.52	119	145	123.054	148.054
13.54	116	161	122.959	147.841
13.56	135	145	122.864	147.629
13.58	131	159	122.77	147.417
13.6	121	176	122.675	147.206
13.62	125	150	122.582	146.996
13.64	129	162	122.488	146.786
13.66	141	160	122.394	146.577
13.68	127	152	122.301	146.368
13.7	137	165	122.208	146.16
13.72	141	145	122.116	145.952
13.74	127	173	122.023	145.745
13.76	136	169	121.931	145.539
13.78	120	131	121.839	145.333
13.8	140	187	121.747	145.128
13.82	115	152	121.656	144.924
13.84	129	157	121.565	144.72
13.86	141	172	121.474	144.516
13.88	123	149	121.383	144.313
13.9	130	163	121.292	144.111
13.92	109	139	121.202	143.909
13.94	130	153	121.112	143.708
13.96	109	156	121.022	143.508
13.98	123	145	120.933	143.308
14	140	150	120.844	143.108
14.02	133	155	120.755	142.909
14.04	114	155	120.666	142.711
14.06	124	136	120.577	142.513
14.08	151	119	120.489	142.316
14.1	115	158	120.401	142.119
14.12	102	147	120.313	141.923
14.14	132	154	120.225	141.728
14.16	128	139	120.138	141.533
14.18	116	171	120.051	141.339
14.2	129	134	119.964	141.145
14.22	123	132	119.877	140.952
14.24	107	145	119.791	140.759
14.26	139	130	119.705	140.567
14.28	138	157	119.619	140.375
14.3	115	155	119.533	140.184
14.32	128	153	119.448	139.994
14.34	115	142	119.362	139.804
14.36	114	131	119.277	139.614
14.38	121	142	119.193	139.425
14.4	125	142	119.108	139.237
14.42	136	145	119.024	139.049
14.44	113	132	118.94	138.862
14.46	117	157	118.856	138.675
14.48	111	166	118.772	138.489
14.5	104	141	118.689	138.304
14.52	128	136	118.606	138.119
14.54	144	153	118.523	137.934
14.56	134	144	118.44	137.75
14.58	108	157	118.358	137.567
14.6	145	156	118.276	137.384
14.62	113	142	118.194	137.201
14.64	109	151	118.112	137.02
14.66	162	143	118.03	136.838
14.68	125	136	117.949	136.657
14.7	123	145	117.868	136.477
14.72	101	143	117.787	136.298
14.74	125	138	117.706	136.118
14.76	122	151	117.626	135.94
14.78	110	134	117.546	135.762
14.8	111	135	117.466	135.584
14.82	110	144	117.386	135.407
14.84	121	119	117.306	135.23
14.86	102	141	117.227	135.054
14.88	119	123	117.148	134.879
14.9	110	161	117.069	134.704
14.92	131	145	116.991	134.529
14.94	107	132	116.912	134.355
14.96	103	129	116.834	134.182
14.98	116	150	116.756	134.009
15	94	117	116.678	133.836
15.02	104	169	116.601	133.665
15.04	117	126	116.523	133.493
15.06	107	130	116.446	133.322
15.08	118	142	116.369	133.152
15.1	124	136	116.293	132.982
15.12	106	158	116.216	132.813
15.14	125	158	116.14	132.644
15.16	124	154	116.064	132.475
15.18	120	146	115.988	132.308
15.2	110	146	115.913	132.14
15.22	122	141	115.837	131.973
15.24	117	137	115.762	131.807
15.26	106	125	115.687	131.641
15.28	100	123	115.613	131.476
15.3	121	132	115.538	131.311
15.32	102	140	115.464	131.147
15.34	131	145	115.39	130.983
15.36	102	129	115.316	130.819
15.38	100	153	115.242	130.657
15.4	115	126	115.169	130.494
15.42	100	124	115.096	130.332
15.44	93	118	115.023	130.171
15.46	125	138	114.95	130.01
15.48	132	129	114.877	129.85
15.5	125	141	114.805	129.69
15.52	109	100	114.733	129.53
15.54	126	137	114.661	129.371
15.56	108	135	114.589	129.213
15.58	128	128	114.517	129.055
15.6	97	128	114.446	128.897
15.62	113	130	114.375	128.74
15.64	122	130	114.304	128.584
15.66	108	128	114.233	128.428
15.68	98	121	114.163	128.272
15.7	110	139	114.093	128.117
15.72	115	136	114.022	127.963
15.74	109	154	113.953	127.808
15.76	124	133	113.883	127.655
15.78	123	143	113.813	127.502
15.8	110	121	113.744	127.349
15.82	124	129	113.675	127.197
15.84	117	108	113.606	127.045
15.86	115	131	113.538	126.894
15.88	106	135	113.469	126.743
15.9	117	109	113.401	126.593
15.92	111	136	113.334	126.443
15.94	115	143	113.266	126.293
15.96	113	120	113.199	126.144
15.98	121	144	113.132	125.996
16	105	147	113.065	125.848
16.02	110	131	112.998	125.701
16.04	111	127	112.932	125.554
16.06	126	130	112.866	125.408
16.08	105	127	112.8	125.262
16.1	123	146	112.734	125.117
16.12	111	161	112.668	124.972
16.14	114	155	112.604	124.827
16.16	111	148	112.541	124.684
16.18	130	123	112.486	124.54
16.2	122	111	112.448	124.397
16.22	104	133	112.431	124.254
16.24	101	129	112.416	124.113
16.26	92	129	112.371	123.973
16.28	102	113	112.309	123.838
16.3	130	115	112.246	123.716
16.32	114	128	112.183	123.615
16.34	101	114	112.121	123.527
16.36	118	119	112.058	123.422
16.38	105	125	111.996	123.288
16.4	101	117	111.934	123.15
16.42	103	131	111.872	123.013
16.44	101	121	111.81	122.876
16.46	110	119	111.748	122.74
16.48	113	136	111.686	122.604
16.5	110	113	111.625	122.468
16.52	104	115	111.564	122.333
16.54	123	113	111.503	122.198
16.56	114	126	111.442	122.064
16.58	105	129	111.381	121.93
16.6	122	119	111.321	121.796
16.62	114	123	111.26	121.663
16.64	93	108	111.2	121.53
16.66	100	123	111.14	121.398
16.68	110	117	111.081	121.266
16.7	107	132	111.021	121.134
16.72	106	132	110.962	121.003
16.74	106	112	110.903	120.873
16.76	104	138	110.844	120.743
16.78	112	126	110.785	120.613
16.8	120	115	110.726	120.484
16.82	102	137	110.668	120.355
16.84	125	139	110.61	120.226
16.86	94	115	110.552	120.098
16.88	112	113	110.494	119.971
16.9	100	103	110.437	119.844
16.92	108	111	110.379	119.717
16.94	114	133	110.322	119.591
16.96	100	108	110.265	119.465
16.98	91	130	110.208	119.339
17	114	118	110.152	119.214
17.02	98	115	110.095	119.09
17.04	121	105	110.039	118.966
17.06	110	118	109.983	118.842
17.08	101	113	109.927	118.719
17.1	117	121	109.872	118.596
17.12	105	108	109.816	118.474
17.14	122	134	109.761	118.352
17.16	112	119	109.706	118.23
17.18	116	126	109.651	118.109
17.2	111	109	109.597	117.988
17.22	83	137	109.542	117.868
17.24	132	133	109.488	117.748
17.26	99	115	109.434	117.628
17.28	102	134	109.38	117.509
17.3	117	122	109.326	117.391
17.32	118	112	109.273	117.273
17.34	123	121	109.219	117.155
17.36	117	112	109.166	117.037
17.38	100	118	109.113	116.921
17.4	118	138	109.061	116.804
17.42	100	127	109.008	116.688
17.44	104	120	108.956	116.572
17.46	109	115	108.904	116.457
17.48	91	107	108.852	116.342
17.5	127	124	108.8	116.228
17.52	104	119	108.749	116.114
17.54	85	113	108.697	116
17.56	109	104	108.646	115.887
17.58	124	137	108.595	115.775
17.6	108	125	108.545	115.664
17.62	97	127	108.494	115.557
17.64	118	112	108.444	115.454
17.66	96	112	108.394	115.352
17.68	115	115	108.344	115.244
17.7	111	127	108.294	115.135
17.72	120	135	108.245	115.025
17.74	114	123	108.199	114.915
17.76	93	118	108.156	114.806
17.78	106	118	108.118	114.698
17.8	107	115	108.076	114.59
17.82	120	98	108.029	114.482
17.84	97	108	107.98	114.374
17.86	115	124	107.932	114.267
17.88	107	121	107.884	114.161
17.9	103	115	107.837	114.055
17.92	92	114	107.789	113.949
17.94	118	98	107.742	113.843
17.96	103	118	107.694	113.738
17.98	106	100	107.647	113.634
18	116	126	107.601	113.529
18.02	107	139	107.554	113.426
18.04	121	137	107.508	113.322
18.06	122	111	107.461	113.219
18.08	95	106	107.415	113.116
18.1	121	84	107.369	113.014
18.12	109	102	107.324	112.912
18.14	110	123	107.278	112.811
18.16	104	111	107.233	112.71
18.18	108	110	107.188	112.609
18.2	111	116	107.143	112.509
18.22	102	112	107.098	112.409
18.24	108	114	107.054	112.31
18.26	113	116	107.009	112.21
18.28	99	119	106.965	112.112
18.3	117	109	106.921	112.014
18.32	109	120	106.877	111.916
18.34	113	103	106.834	111.818
18.36	113	113	106.79	111.721
18.38	114	114	106.747	111.624
18.4	119	109	106.704	111.528
18.42	120	101	106.661	111.432
18.44	105	117	106.619	111.337
18.46	102	94	106.576	111.241
18.48	112	113	106.534	111.147
18.5	99	104	106.492	111.052
18.52	132	115	106.45	110.958
18.54	112	88	106.409	110.865
18.56	109	108	106.367	110.772
18.58	112	113	106.326	110.679
18.6	125	92	106.285	110.586
18.62	78	83	106.244	110.494
18.64	118	132	106.204	110.403
18.66	93	115	106.163	110.311
18.68	113	106	106.123	110.221
18.7	92	115	106.083	110.13
18.72	115	96	106.043	110.04
18.74	125	92	106.004	109.95
18.76	100	111	105.964	109.861
18.78	95	109	105.925	109.772
18.8	120	107	105.886	109.684
18.82	108	118	105.847	109.596
18.84	127	114	105.809	109.508
18.86	106	120	105.77	109.42
18.88	112	105	105.732	109.334
18.9	123	112	105.694	109.247
18.92	102	105	105.657	109.161
18.94	89	106	105.62	109.075
18.96	97	101	105.583	108.99
18.98	114	120	105.546	108.905
19	103	96	105.509	108.821
19.02	115	102	105.473	108.737
19.04	115	116	105.437	108.654
19.06	90	103	105.401	108.571
19.08	102	112	105.365	108.488
19.1	87	105	105.33	108.406
19.12	102	104	105.295	108.324
19.14	107	94	105.26	108.242
19.16	100	100	105.228	108.161
19.18	115	100	105.203	108.08
19.2	120	110	105.196	108.001
19.22	94	121	105.21	107.922
19.24	114	120	105.225	107.849
19.26	124	118	105.21	107.788
19.28	98	104	105.179	107.748
19.3	127	104	105.147	107.722
19.32	110	118	105.115	107.679
19.34	101	104	105.083	107.607
19.36	117	103	105.051	107.531
19.38	97	115	105.02	107.455
19.4	100	99	104.989	107.38
19.42	109	94	104.958	107.305
19.44	117	88	104.927	107.231
19.46	117	116	104.896	107.157
19.48	114	100	104.866	107.083
19.5	102	118	104.836	107.01
19.52	102	115	104.806	106.937
19.54	113	99	104.776	106.864
19.56	118	114	104.746	106.792
19.58	113	104	104.717	106.72
19.6	109	106	104.688	106.648
19.62	108	99	104.659	106.577
19.64	104	100	104.631	106.506
19.66	106	107	104.603	106.436
19.68	113	92	104.575	106.367
19.7	114	94	104.548	106.297
19.72	101	107	104.521	106.229
19.74	98	107	104.494	106.16
19.76	98	113	104.467	106.093
19.78	109	116	104.441	106.025
19.8	99	92	104.415	105.958
19.82	107	100	104.389	105.892
19.84	114	110	104.363	105.826
19.86	106	103	104.339	105.76
19.88	110	97	104.316	105.695
19.9	92	85	104.302	105.63
19.92	102	126	104.304	105.566
19.94	100	103	104.328	105.504
19.96	105	93	104.353	105.447
19.98	92	98	104.347	105.402
20	108	101	104.327	105.378
20.02	86	100	104.305	105.368
20.04	91	130	104.284	105.341
20.06	92	112	104.263	105.286
20.08	130	84	104.242	105.226
20.1	119	104	104.221	105.167
20.12	105	99	104.2	105.109
20.14	120	101	104.18	105.05
20.16	114	94	104.161	104.993
20.18	91	100	104.141	104.935
20.2	117	99	104.121	104.879
20.22	105	110	104.102	104.822
20.24	120	95	104.084	104.766
20.26	109	96	104.065	104.711
20.28	109	93	104.047	104.656
20.3	106	106	104.029	104.601
20.32	113	98	104.012	104.547
20.34	93	102	103.995	104.493
20.36	99	104	103.978	104.44
20.38	110	94	103.961	104.387
20.4	96	112	103.945	104.335
20.42	116	98	103.929	104.283
20.44	87	94	103.914	104.232
20.46	83	101	103.899	104.181
20.48	126	104	103.884	104.131
20.5	110	98	103.87	104.081
20.52	103	130	103.856	104.032
20.54	117	80	103.843	103.983
20.56	111	91	103.83	103.935
20.58	95	89	103.817	103.887
20.6	113	101	103.805	103.84
20.62	93	107	103.793	103.794
20.64	92	107	103.781	103.748
20.66	117	83	103.77	103.702
20.68	98	111	103.759	103.658
20.7	105	107	103.749	103.613
20.72	100	91	103.739	103.57
20.74	126	114	103.73	103.526
20.76	115	101	103.721	103.484
20.78	108	90	103.712	103.442
20.8	104	104	103.704	103.4
20.82	97	107	103.696	103.359
20.84	100	105	103.689	103.319
20.86	115	100	103.682	103.279
20.88	109	115	103.676	103.24
20.9	104	98	103.67	103.202
20.92	102	121	103.665	103.164
20.94	113	118	103.66	103.127
20.96	86	101	103.656	103.091
20.98	95	108	103.652	103.055
21	114	105	103.649	103.019
21.02	116	107	103.646	102.985
21.04	109	82	103.644	102.951
21.06	104	92	103.642	102.918
21.08	99	94	103.641	102.885
21.1	95	97	103.64	102.853
21.12	89	102	103.64	102.822
21.14	86	94	103.641	102.792
21.16	111	111	103.642	102.764
21.18	108	104	103.643	102.739
21.2	110	99	103.646	102.72
21.22	94	93	103.649	102.701
21.24	92	96	103.653	102.677
21.26	101	113	103.661	102.651
21.28	94	103	103.674	102.626
21.3	105	97	103.693	102.601
21.32	101	90	103.708	102.578
21.34	104	113	103.716	102.555
21.36	111	92	103.724	102.534
21.38	104	101	103.732	102.516
21.4	106	94	103.741	102.498
21.42	109	90	103.75	102.478
21.44	89	89	103.761	102.46
21.46	104	87	103.772	102.441
21.48	114	84	103.783	102.424
21.5	107	82	103.796	102.408
21.52	100	92	103.809	102.392
21.54	101	81	103.823	102.378
21.56	108	102	103.838	102.364
21.58	101	105	103.853	102.351
21.6	129	99	103.87	102.339
21.62	110	105	103.887	102.329
21.64	100	81	103.905	102.319
21.66	111	109	103.924	102.31
21.68	105	107	103.944	102.302
21.7	111	92	103.965	102.295
21.72	87	100	103.987	102.289
21.74	102	102	104.009	102.284
21.76	109	105	104.033	102.281
21.78	97	102	104.058	102.278
21.8	114	101	104.084	102.277
21.82	102	90	104.11	102.276
21.84	124	98	104.138	102.277
21.86	117	102	104.167	102.279
21.88	100	93	104.197	102.282
21.9	97	89	104.228	102.287
21.92	113	104	104.26	102.292
21.94	92	88	104.293	102.299
21.96	108	104	104.328	102.307
21.98	116	82	104.364	102.317
22	106	110	104.403	102.328
22.02	97	91	104.447	102.34
22.04	114	100	104.498	102.354
22.06	106	103	104.547	102.369
22.08	107	89	104.591	102.389
22.1	98	91	104.635	102.415
22.12	107	98	104.68	102.445
22.14	95	89	104.726	102.472
22.16	101	89	104.774	102.496
22.18	104	106	104.824	102.52
22.2	86	98	104.875	102.546
22.22	95	108	104.927	102.574
22.24	92	90	104.982	102.603
22.26	96	108	105.037	102.634
22.28	113	103	105.095	102.667
22.3	118	100	105.154	102.702
22.32	122	105	105.215	102.738
22.34	96	94	105.278	102.777
22.36	114	92	105.343	102.817
22.38	100	107	105.41	102.86
22.4	116	118	105.479	102.904
22.42	97	102	105.549	102.951
22.44	93	110	105.622	103
22.46	119	101	105.697	103.051
22.48	107	105	105.775	103.104
22.5	108	101	105.854	103.16
22.52	88	90	105.936	103.218
22.54	112	94	106.02	103.278
22.56	99	113	106.107	103.341
22.58	99	126	106.196	103.407
22.6	101	100	106.288	103.475
22.62	96	100	106.382	103.546
22.64	83	110	106.48	103.62
22.66	118	99	106.582	103.697
22.68	106	116	106.688	103.777
22.7	98	80	106.797	103.86
22.72	92	96	106.906	103.947
22.74	118	82	107.018	104.039
22.76	85	90	107.134	104.135
22.78	105	101	107.252	104.232
22.8	102	101	107.375	104.331
22.82	101	92	107.501	104.435
22.84	101	117	107.63	104.541
22.86	118	107	107.764	104.652
22.88	99	102	107.901	104.767
22.9	100	104	108.042	104.886
22.92	106	84	108.188	105.009
22.94	96	84	108.338	105.136
22.96	102	102	108.492	105.269
22.98	114	99	108.651	105.405
23	111	119	108.814	105.547
23.02	96	96	108.983	105.693
23.04	92	88	109.157	105.845
23.06	106	104	109.336	106.002
23.08	96	96	109.521	106.164
23.1	96	106	109.711	106.332
23.12	126	119	109.907	106.506
23.14	127	126	110.109	106.687
23.16	109	101	110.317	106.873
23.18	89	98	110.532	107.066
23.2	114	100	110.754	107.266
23.22	138	93	110.983	107.475
23.24	117	105	111.219	107.694
23.26	110	112	111.463	107.925
23.28	126	93	111.717	108.163
23.3	104	101	111.984	108.404
23.32	109	87	112.261	108.651
23.34	99	110	112.546	108.906
23.36	110	112	112.833	109.171
23.38	122	108	113.129	109.445
23.4	109	105	113.434	109.729
23.42	143	113	113.75	110.023
23.44	116	106	114.077	110.328
23.46	110	119	114.415	110.645
23.48	103	109	114.765	110.973
23.5	115	117	115.127	111.313
23.52	122	107	115.501	111.666
23.54	98	109	115.889	112.033
23.56	113	119	116.291	112.413
23.58	97	122	116.708	112.808
23.6	115	97	117.139	113.218
23.62	114	112	117.587	113.644
23.64	117	110	118.051	114.087
23.66	113	120	118.532	114.547
23.68	115	108	119.032	115.027
23.7	143	96	119.551	115.529
23.72	113	117	120.091	116.056
23.74	122	110	120.654	116.603
23.76	124	127	121.243	117.167
23.78	118	96	121.859	117.752
23.8	92	119	122.496	118.361
23.82	156	112	123.154	118.996
23.84	125	126	123.837	119.659
23.86	114	115	124.549	120.35
23.88	124	106	125.291	121.071
23.9	120	143	126.066	121.824
23.92	123	126	126.873	122.611
23.94	132	139	127.717	123.434
23.96	134	122	128.598	124.294
23.98	135	127	129.519	125.195
24	126	116	130.482	126.137
24.02	141	105	131.49	127.125
24.04	118	114	132.545	128.161
24.06	133	133	133.651	129.247
24.08	147	133	134.811	130.388
24.1	110	132	136.027	131.586
24.12	134	162	137.305	132.845
24.14	141	120	138.647	134.169
24.16	142	151	140.059	135.564
24.18	142	140	141.545	137.033
24.2	140	130	143.11	138.582
24.22	144	148	144.76	140.217
24.24	162	140	146.5	141.944
24.26	138	109	148.339	143.769
24.28	148	138	150.282	145.701
24.3	143	144	152.338	147.748
24.32	149	152	154.516	149.918
24.34	150	171	156.826	152.221
24.36	156	179	159.278	154.67
24.38	168	170	161.885	157.275
24.4	177	146	164.658	160.05
24.42	156	159	167.615	163.012
24.44	180	134	170.77	166.176
24.46	157	165	174.142	169.563
24.48	173	163	177.753	173.193
24.5	161	188	181.627	177.093
24.52	173	162	185.791	181.29
24.54	194	173	190.277	185.818
24.56	199	194	195.12	190.714
24.58	217	173	200.365	196.023
24.6	200	189	206.059	201.796
24.62	190	209	212.261	208.094
24.64	222	225	219.039	214.988
24.66	207	202	226.476	222.563
24.68	231	204	234.667	230.922
24.7	249	221	243.731	240.187
24.72	250	228	253.809	250.506
24.74	285	258	265.074	262.06
24.76	265	284	277.738	275.072
24.78	320	298	292.061	289.813
24.8	351	286	308.359	306.617
24.82	305	333	327.018	325.89
24.84	352	327	348.509	348.125
24.86	347	366	373.39	373.914
24.88	389	403	402.327	403.956
24.9	399	464	436.09	439.063
24.92	445	489	475.56	480.163
24.94	525	539	521.722	528.292
24.96	595	594	575.651	584.581
24.98	630	638	638.49	650.227
25	713	716	711.412	726.455
25.02	811	787	795.573	814.461
25.04	917	891	892.047	915.34
25.06	1024	1042	1001.74	1029.98
25.08	1161	1112	1125.29	1158.96
25.1	1208	1273	1262.92	1302.36
25.12	1437	1439	1414.31	1459.62
25.14	1492	1579	1578.38	1629.3
25.16	1701	1780	1753.07	1808.81
25.18	1978	2015	1935.09	1994.12
25.2	2078	2284	2119.68	2179.57
25.22	2220	2364	2300.46	2357.76
25.24	2531	2531	2469.5	2519.8
25.26	2655	2683	2617.78	2656
25.28	2788	2786	2736.03	2757.01
25.3	2829	2881	2815.97	2815.2
25.32	2918	2822	2851.58	2826
25.34	2886	2742	2840.17	2788.66
25.36	2829	2792	2782.78	2706.28
25.38	2654	2594	2683.85	2585.2
25.4	2508	2487	2550.48	2433.87
25.42	2450	2275	2391.26	2261.62
25.44	2233	2072	2215.15	2077.58
25.46	1935	1879	2030.55	1889.78
25.48	1797	1609	1844.7	1704.81
25.5	1658	1512	1663.34	1527.62
25.52	1454	1332	1490.72	1361.66
25.54	1272	1209	1329.75	1209.09
25.56	1160	1032	1182.22	1071.05
25.58	1108	927	1048.99	947.871
25.6	925	860	930.246	839.28
25.62	807	748	825.618	744.571
25.64	701	654	734.367	662.735
25.66	666	606	655.484	592.573
25.68	594	570	587.796	532.792
25.7	541	516	530.055	482.083
25.72	516	467	481.004	439.183
25.74	452	436	439.436	402.911
25.76	409	392	404.226	372.204
25.78	367	360	374.36	346.123
25.8	364	334	348.944	323.863
25.82	340	316	327.212	304.744
25.84	317	295	308.514	288.204
25.86	289	288	292.312	273.78
25.88	305	272	278.162	261.101
25.9	284	272	265.708	249.867
25.92	249	238	254.662	239.841
25.94	250	209	244.792	230.834
25.96	245	230	235.914	222.694
25.98	251	227	227.883	215.299
26	232	217	220.578	208.549
26.02	213	198	213.906	202.362
26.04	201	214	207.788	196.675
26.06	190	183	202.161	191.432
26.08	175	184	196.972	186.588
26.1	200	204	192.175	182.102
26.12	167	185	187.727	177.94
26.14	192	155	183.596	174.073
26.16	162	156	179.755	170.475
26.18	145	152	176.179	167.122
26.2	155	167	172.845	163.994
26.22	174	160	169.733	161.073
26.24	181	154	166.826	158.343
26.26	165	133	164.108	155.79
26.28	162	144	161.565	153.399
26.3	157	133	159.184	151.161
26.32	157	154	156.953	149.064
26.34	164	155	154.863	147.099
26.36	142	169	152.905	145.257
26.38	149	141	151.069	143.53
26.4	165	144	149.348	141.913
26.42	152	157	147.737	140.398
26.44	135	142	146.228	138.98
26.46	163	126	144.817	137.655
26.48	140	141	143.498	136.418
26.5	121	133	142.268	135.265
26.52	142	129	141.123	134.193
26.54	151	126	140.06	133.2
26.56	152	141	139.076	132.282
26.58	102	149	138.169	131.438
26.6	152	115	137.338	130.667
26.62	155	111	136.58	129.969
26.64	148	133	135.897	129.341
26.66	132	113	135.286	128.786
26.68	129	125	134.75	128.302
26.7	121	121	134.289	127.893
26.72	133	107	133.904	127.56
26.74	139	134	133.598	127.305
26.76	138	124	133.374	127.132
26.78	117	155	133.236	127.046
26.8	135	138	133.191	127.054
26.82	136	108	133.244	127.161
26.84	138	130	133.403	127.378
26.86	126	127	133.68	127.716
26.88	154	131	134.086	128.188
26.9	135	128	134.637	128.813
26.92	115	122	135.353	129.611
26.94	134	130	136.258	130.609
26.96	135	138	137.381	131.839
26.98	140	119	138.759	133.341
27	132	172	140.436	135.16
27.02	121	124	142.464	137.349
27.04	129	119	144.897	139.964
27.06	157	145	147.796	143.063
27.08	161	142	151.221	146.702
27.1	166	132	155.232	150.944
27.12	151	184	159.899	155.874
27.14	167	171	165.316	161.617
27.16	209	152	171.624	168.361
27.18	160	159	179.035	176.378
27.2	193	184	187.857	186.052
27.22	219	199	198.514	197.9
27.24	215	216	211.583	212.598
27.26	247	262	227.817	230.982
27.28	262	245	248.161	254.025
27.3	276	316	273.715	282.73
27.32	284	298	305.591	317.872
27.34	328	390	344.557	359.496
27.36	407	419	390.345	406.154
27.38	469	443	440.699	454.134
27.4	507	495	490.607	497.361
27.42	565	546	532.656	528.738
27.44	564	498	559.224	542.769
27.46	541	548	565.667	537.752
27.48	581	517	552.071	515.796
27.5	504	476	522.179	481.091
27.52	427	427	481.082	438.431
27.54	445	365	433.985	392.632
27.56	373	331	385.891	348.014
27.58	331	302	340.947	307.657
27.6	319	254	301.666	273.035
27.62	247	249	268.82	244.308
27.64	265	232	242.006	220.883
27.66	221	200	220.313	201.903
27.68	194	182	202.761	186.517
27.7	187	169	188.487	173.988
27.72	179	138	176.797	163.72
27.74	164	148	167.153	155.242
27.76	168	169	159.137	148.188
27.78	164	131	152.433	142.275
27.8	135	149	146.792	137.282
27.82	150	116	142.007	133.036
27.84	128	129	137.913	129.399
27.86	155	135	134.389	126.26
27.88	119	140	131.334	123.524
27.9	129	110	128.668	121.122
27.92	121	128	126.324	119.002
27.94	125	113	124.252	117.121
27.96	109	100	122.409	115.441
27.98	144	130	120.761	113.935
28	135	139	119.28	112.577
28.02	129	134	117.942	111.348
28.04	121	108	116.73	110.23
28.06	114	114	115.627	109.21
28.08	125	110	114.618	108.276
28.1	116	120	113.694	107.418
28.12	104	111	112.843	106.627
28.14	100	101	112.059	105.896
28.16	117	109	111.333	105.218
28.18	100	102	110.659	104.588
28.2	99	112	110.032	104
28.22	116	102	109.447	103.452
28.24	118	108	108.901	102.939
28.26	124	118	108.389	102.457
28.28	114	104	107.909	102.004
28.3	107	109	107.457	101.578
28.32	99	88	107.031	101.176
28.34	111	87	106.629	100.796
28.36	116	104	106.249	100.437
28.38	109	123	105.889	100.096
28.4	113	106	105.547	99.772
28.42	113	104	105.223	99.4642
28.44	99	95	104.915	99.1712
28.46	122	111	104.623	98.8919
28.48	106	99	104.346	98.6256
28.5	106	114	104.08	98.372
28.52	135	81	103.825	98.131
28.54	114	110	103.58	97.9008
28.56	106	102	103.345	97.678
28.58	110	103	103.12	97.4633
28.6	103	97	102.904	97.2571
28.62	106	100	102.696	97.0588
28.64	117	113	102.496	96.868
28.66	98	94	102.304	96.6842
28.68	112	95	102.118	96.5071
28.7	107	98	101.94	96.3362
28.72	97	109	101.767	96.1713
28.74	112	100	101.6	96.012
28.76	114	109	101.439	95.858
28.78	100	108	101.284	95.709
28.8	91	96	101.133	95.5648
28.82	101	94	100.987	95.4251
28.84	116	113	100.845	95.2897
28.86	94	94	100.708	95.1585
28.88	100	110	100.575	95.0312
28.9	110	88	100.446	94.9076
28.92	109	104	100.321	94.7879
28.94	112	91	100.199	94.6719
28.96	118	111	100.08	94.5591
28.98	102	84	99.9651	94.4489
29	98	81	99.853	94.3417
29.02	93	92	99.744	94.2372
29.04	86	100	99.638	94.1355
29.06	89	105	99.5351	94.0364
29.08	101	102	99.4346	93.9399
29.1	120	91	99.3362	93.8457
29.12	92	112	99.2401	93.7539
29.14	100	99	99.1464	93.6643
29.16	96	104	99.0549	93.5769
29.18	96	102	98.9655	93.4916
29.2	98	81	98.8782	93.4082
29.22	97	110	98.7929	93.3268
29.24	94	93	98.7095	93.2472
29.26	95	93	98.6279	93.1694
29.28	89	105	98.5481	93.0934
29.3	102	103	98.4701	93.019
29.32	99	96	98.3937	92.9463
29.34	98	107	98.3189	92.8751
29.36	100	104	98.2457	92.8055
29.38	85	80	98.1739	92.7373
29.4	90	107	98.1037	92.6705
29.42	99	80	98.0348	92.6051
29.44	73	80	97.9673	92.5411
29.46	104	98	97.9012	92.4783
29.48	99	93	97.8363	92.4168
29.5	91	84	97.7726	92.3565
29.52	105	91	97.7102	92.2974
29.54	93	104	97.6489	92.2394
29.56	118	105	97.5888	92.1826
29.58	99	92	97.5298	92.1268
29.6	102	86	97.4718	92.0721
29.62	106	84	97.4149	92.0187
29.64	108	84	97.359	91.9672
29.66	109	102	97.3041	91.9184
29.68	90	107	97.2502	91.8721
29.7	80	105	97.1976	91.8254
29.72	100	92	97.1472	91.777
29.74	113	106	97.0997	91.729
29.76	112	101	97.0536	91.6818
29.78	93	122	97.0054	91.6355
29.8	91	103	96.9569	91.5899
29.82	111	98	96.909	91.5452
29.84	112	87	96.8619	91.5012
29.86	92	99	96.8156	91.458
29.88	104	78	96.77	91.4155
29.9	108	101	96.7251	91.3738
29.92	94	93	96.6809	91.3327
29.94	91	90	96.6374	91.2923
29.96	93	105	96.5946	91.2525
29.98	87	100	96.5525	91.2135
30	105	106	96.5109	91.175
30.02	103	91	96.47	91.1372
30.04	104	85	96.4297	91.1001
30.06	100	98	96.3901	91.0635
30.08	92	90	96.3509	91.0275
30.1	103	95	96.3124	90.9921
30.12	104	87	96.2744	90.9572
30.14	87	95	96.237	90.9229
30.16	95	112	96.2001	90.8892
30.18	105	108	96.1638	90.8559
30.2	95	88	96.1279	90.8232
30.22	107	83	96.0926	90.791
30.24	94	93	96.058	90.7593
30.26	98	84	96.0244	90.728
30.28	93	93	95.9926	90.6975
30.3	96	82	95.962	90.6684
30.32	100	104	95.9308	90.641
30.34	104	102	95.8985	90.6141
30.36	90	96	95.8662	90.5853
30.38	89	91	95.8343	90.5566
30.4	92	95	95.8028	90.5282
30.42	96	93	95.7717	90.5003
30.44	97	99	95.7411	90.4729
30.46	85	88	95.7109	90.4459
30.48	104	92	95.6811	90.4193
30.5	124	87	95.6517	90.3931
30.52	96	110	95.6226	90.3669
30.54	106	96	95.594	90.3399
30.56	91	98	95.5656	90.309
30.58	104	80	95.5375	90.2672
30.6	97	99	95.5092	90.2058
30.62	94	102	95.479	90.131
30.64	122	106	95.4419	90.0728
30.66	88	93	95.3882	90.0458
30.68	96	116	95.3137	90.0238
30.7	121	87	95.2409	90.0025
30.72	87	80	95.2022	89.9822
30.74	96	109	95.183	89.9658
30.76	89	98	95.1735	89.9571
30.78	103	97	95.1647	89.9528
30.8	96	97	95.1443	89.9389
30.82	112	105	95.1219	89.9204
30.84	95	85	95.0994	89.9016
30.86	93	106	95.0772	89.8834
30.88	98	108	95.0553	89.8665
30.9	98	90	95.0338	89.8505
30.92	91	92	95.0126	89.8342
30.94	90	87	94.9918	89.8171
30.96	88	90	94.9715	89.8
30.98	118	106	94.9519	89.7831
31	107	94	94.9337	89.7665
31.02	101	102	94.9163	89.7501
31.04	113	103	94.8982	89.7341
31.06	113	89	94.8806	89.7185
31.08	97	94	94.8637	89.7039
31.1	88	98	94.8463	89.6905
31.12	88	99	94.8292	89.6769
31.14	99	99	94.8128	89.6624
31.16	106	103	94.7955	89.65
31.18	98	102	94.7781	89.6373
31.2	97	94	94.7609	89.6235
31.22	107	84	94.7437	89.6097
31.24	95	93	94.7266	89.5962
31.26	84	95	94.7097	89.5828
31.28	93	84	94.693	89.5697
31.3	81	82	94.6766	89.5567
31.32	92	71	94.6603	89.544
31.34	95	97	94.6442	89.5315
31.36	101	105	94.6284	89.5189
31.38	119	75	94.6127	89.5052
31.4	114	93	94.5972	89.4875
31.42	94	96	94.5819	89.4587
31.44	97	88	94.5666	89.4101
31.46	93	93	94.5509	89.3479
31.48	80	87	94.5332	89.3019
31.5	91	87	94.5085	89.2871
31.52	103	111	94.467	89.2772
31.54	95	86	94.4046	89.2678
31.56	97	93	94.3436	89.2585
31.58	110	85	94.315	89.2494
31.6	77	93	94.3007	89.2406
31.62	93	101	94.2883	89.232
31.64	97	105	94.276	89.2235
31.66	95	100	94.2632	89.2153
31.68	94	82	94.2486	89.2073
31.7	87	87	94.2304	89.1992
31.72	103	89	94.2092	89.1905
31.74	93	88	94.1909	89.1797
31.76	107	80	94.1793	89.1669
31.78	90	93	94.1699	89.1561
31.8	95	102	94.1633	89.1504
31.82	97	99	94.1603	89.1457
31.84	93	83	94.1581	89.1425
31.86	104	97	94.1532	89.1401
31.88	89	83	94.1517	89.1367
31.9	97	102	94.1535	89.1361
31.92	105	91	94.1512	89.1414
31.94	97	87	94.1435	89.1476
31.96	106	93	94.1351	89.1447
31.98	106	86	94.1269	89.1403
32	95	76	94.1188	89.1361
32.02	109	83	94.1108	89.132
32.04	105	101	94.1031	89.128
32.06	99	74	94.0955	89.1243
32.08	97	91	94.088	89.1206
32.1	97	86	94.0806	89.1172
32.12	83	86	94.0734	89.1139
32.14	85	98	94.0664	89.1108
32.16	98	92	94.0595	89.1078
32.18	101	83	94.0527	89.105
32.2	97	89	94.0461	89.1026
32.22	95	90	94.0397	89.1012
32.24	107	100	94.0335	89.1018
32.26	92	75	94.0279	89.1041
32.28	88	95	94.0237	89.1053
32.3	90	86	94.0217	89.1041
32.32	94	107	94.0203	89.1026
32.34	95	86	94.0163	89.1013
32.36	119	94	94.0113	89.1001
32.38	74	69	94.0063	89.0991
32.4	103	98	94.0015	89.0983
32.42	106	110	93.9968	89.0977
32.44	91	75	93.9923	89.0973
32.46	99	99	93.988	89.097
32.48	103	75	93.9839	89.0969
32.5	87	76	93.9799	89.0969
32.52	87	99	93.9761	89.0972
32.54	82	82	93.9726	89.0976
32.56	98	77	93.9697	89.0982
32.58	103	98	93.9682	89.0993
32.6	83	91	93.9682	89.1015
32.62	102	92	93.9679	89.1054
32.64	71	97	93.9656	89.1099
32.66	107	99	93.963	89.1127
32.68	92	98	93.9607	89.1152
32.7	95	82	93.9585	89.1178
32.72	104	94	93.9565	89.12
32.74	102	90	93.9549	89.1224
32.76	84	85	93.9536	89.1249
32.78	96	94	93.9528	89.1277
32.8	99	89	93.952	89.1306
32.82	97	88	93.951	89.1338
32.84	99	85	93.9502	89.1371
32.86	86	82	93.9495	89.1406
32.88	96	118	93.949	89.1444
32.9	75	90	93.9488	89.1483
32.92	109	117	93.9487	89.1525
32.94	111	95	93.9488	89.1568
32.96	107	94	93.9492	89.1614
32.98	84	93	93.9497	89.1662
33	104	76	93.9505	89.1712
33.02	101	90	93.9514	89.1765
33.04	114	84	93.9526	89.1819
33.06	102	104	93.954	89.1876
33.08	103	98	93.9557	89.1935
33.1	91	84	93.9575	89.1997
33.12	105	89	93.9596	89.2061
33.14	106	98	93.9619	89.2127
33.16	81	97	93.9645	89.2196
33.18	92	91	93.9673	89.2267
33.2	112	86	93.9703	89.2341
33.22	95	88	93.9736	89.2418
33.24	86	91	93.9771	89.2497
33.26	90	78	93.9809	89.2579
33.28	77	82	93.985	89.2663
33.3	98	92	93.9893	89.275
33.32	99	100	93.9938	89.284
33.34	84	78	93.9987	89.2933
33.36	90	82	94.0038	89.3028
33.38	94	94	94.0092	89.3126
33.4	89	114	94.0149	89.3228
33.42	99	111	94.0208	89.3332
33.44	100	91	94.0271	89.344
33.46	103	82	94.0336	89.355
33.48	87	93	94.0404	89.3663
33.5	106	98	94.0476	89.378
33.52	91	91	94.055	89.3902
33.54	108	100	94.0628	89.4029
33.56	88	83	94.071	89.4162
33.58	91	97	94.0794	89.4297
33.6	98	95	94.0883	89.4432
33.62	104	96	94.0974	89.4569
33.64	84	88	94.107	89.4711
33.66	102	74	94.1169	89.4856
33.68	92	98	94.127	89.5005
33.7	96	97	94.1357	89.5158
33.72	89	94	94.1406	89.5314
33.74	99	84	94.1423	89.5471
33.76	93	102	94.1469	89.5619
33.78	111	83	94.1583	89.5742
33.8	83	77	94.1712	89.5829
33.82	81	78	94.1846	89.5921
33.84	74	112	94.1984	89.6079
33.86	111	97	94.2128	89.6267
33.88	96	93	94.2275	89.6462
33.9	100	94	94.2428	89.6663
33.92	107	90	94.2586	89.6869
33.94	96	108	94.2749	89.708
33.96	102	92	94.2917	89.7296
33.98	97	81	94.3091	89.7519
34	114	101	94.3271	89.7747
34.02	112	103	94.3457	89.7981
34.04	90	88	94.3649	89.8221
34.06	112	96	94.3846	89.8466
34.08	109	100	94.405	89.8717
34.1	92	98	94.426	89.8974
34.12	92	92	94.4477	89.9238
34.14	91	86	94.4701	89.9509
34.16	99	93	94.4931	89.9787
34.18	98	82	94.5168	90.0073
34.2	94	96	94.5411	90.0367
34.22	113	88	94.5661	90.0669
34.24	103	91	94.5919	90.0979
34.26	95	117	94.6185	90.1299
34.28	82	105	94.646	90.1626
34.3	98	85	94.6743	90.1959
34.32	108	97	94.7036	90.2291
34.34	99	107	94.7338	90.259
34.36	108	104	94.7649	90.2785
34.38	90	81	94.7972	90.2791
34.4	108	97	94.8304	90.2662
34.42	103	103	94.8646	90.2704
34.44	102	101	94.8993	90.3072
34.46	100	89	94.9329	90.3502
34.48	98	106	94.9604	90.3947
34.5	94	106	94.9718	90.4405
34.52	108	102	94.9631	90.4877
34.54	94	102	94.9572	90.5363
34.56	103	80	94.9856	90.5865
34.58	97	96	95.0293	90.6382
34.6	88	104	95.0763	90.6917
34.62	89	90	95.1249	90.7469
34.64	103	102	95.1752	90.8042
34.66	87	90	95.2273	90.8637
34.68	85	83	95.2812	90.9261
34.7	90	82	95.3371	90.9912
34.72	91	88	95.3951	91.058
34.74	89	94	95.456	91.1258
34.76	98	84	95.5202	91.1958
34.78	90	88	95.5873	91.2684
34.8	111	84	95.6555	91.3438
34.82	97	83	95.7255	91.4223
34.84	101	104	95.7983	91.5038
34.86	82	95	95.874	91.5878
34.88	89	88	95.953	91.675
34.9	94	92	96.0353	91.7656
34.92	85	95	96.1209	91.8599
34.94	101	91	96.2097	91.9581
34.96	93	117	96.3023	92.0603
34.98	97	75	96.3988	92.1669
35	104	85	96.4996	92.2781
35.02	86	102	96.6049	92.3943
35.04	101	94	96.7151	92.5157
35.06	89	99	96.8304	92.6428
35.08	80	93	96.9513	92.7759
35.1	104	88	97.078	92.9154
35.12	104	103	97.2111	93.0619
35.14	107	95	97.3509	93.2159
35.16	87	94	97.4981	93.3778
35.18	95	93	97.6531	93.5485
35.2	111	85	97.8167	93.7285
35.22	95	103	97.9894	93.9187
35.24	100	103	98.1721	94.1199
35.26	92	79	98.3657	94.3332
35.28	92	97	98.5711	94.5599
35.3	95	80	98.7894	94.8012
35.32	112	90	99.0219	95.0583
35.34	92	118	99.2702	95.3323
35.36	92	106	99.5358	95.6253
35.38	104	88	99.8202	95.9395
35.4	108	101	100.125	96.2773
35.42	111	98	100.453	96.6414
35.44	101	111	100.808	97.0349
35.46	88	104	101.191	97.4616
35.48	116	104	101.608	97.9258
35.5	93	89	102.061	98.4327
35.52	107	91	102.558	98.9886
35.54	112	103	103.103	99.6008
35.56	117	115	103.705	100.278
35.58	121	98	104.372	101.032
35.6	97	121	105.116	101.875
35.62	81	114	105.95	102.824
35.64	86	113	106.89	103.9
35.66	92	108	107.955	105.126
35.68	115	114	109.168	106.52
35.7	112	117	110.553	108.102
35.72	116	129	112.139	109.903
35.74	109	97	113.946	111.951
35.76	128	123	115.992	114.28
35.78	111	108	118.313	116.936
35.8	137	140	120.959	119.986
35.82	135	128	124.002	123.529
35.84	127	146	127.544	127.7
35.86	157	154	131.722	132.681
35.88	132	141	136.721	138.709
35.9	145	147	142.784	146.083
35.92	139	154	150.223	155.164
35.94	160	153	159.415	166.35
35.96	181	175	170.777	180.013
35.98	195	227	184.679	196.355
36	220	218	201.252	215.155
36.02	232	256	220.063	235.444
36.04	220	254	239.743	255.278
36.06	239	298	257.874	271.957
36.08	275	271	271.546	282.895
36.1	286	275	278.588	286.75
36.12	292	287	278.633	283.914
36.14	275	263	272.964	275.87
36.16	260	291	263.268	264.08
36.18	238	246	250.679	249.537
36.2	232	229	235.904	233.114
36.22	202	220	219.847	215.957
36.24	183	186	203.766	199.364
36.26	196	182	188.872	184.373
36.28	169	161	175.915	171.517
36.3	157	172	165.121	160.873
36.32	155	147	156.367	152.253
36.34	155	140	149.376	145.368
36.36	148	134	143.846	139.921
36.38	131	149	139.509	135.652
36.4	130	139	136.142	132.345
36.42	136	120	133.573	129.833
36.44	124	118	131.674	127.99
36.46	128	141	130.351	126.721
36.48	130	121	129.536	125.962
36.5	113	119	129.184	125.667
36.52	137	136	129.265	125.809
36.54	122	116	129.766	126.378
36.56	143	143	130.685	127.377
36.58	139	126	132.032	128.818
36.6	130	112	133.826	130.715
36.62	132	136	136.096	133.095
36.64	129	128	138.874	135.994
36.66	150	142	142.194	139.446
36.68	154	148	146.084	143.488
36.7	147	154	150.578	148.151
36.72	144	153	155.705	153.46
36.74	147	171	161.488	159.429
36.76	188	154	167.929	166.058
36.78	201	187	175.016	173.321
36.8	198	180	182.708	181.163
36.82	190	177	190.93	189.488
36.84	179	198	199.562	198.151
36.86	200	215	208.431	206.942
36.88	227	223	217.302	215.589
36.9	229	223	225.882	223.765
36.92	247	228	233.826	231.102
36.94	235	239	240.77	237.233
36.96	248	230	246.366	241.835
36.98	265	219	250.335	244.68
37	257	244	252.494	245.658
37.02	231	213	252.785	244.789
37.04	233	239	251.269	242.206
37.06	251	238	248.111	238.133
37.08	225	220	243.555	232.846
37.1	234	216	237.884	226.649
37.12	208	203	231.407	219.878
37.14	209	217	224.467	212.86
37.16	219	214	217.383	205.889
37.18	212	209	210.428	199.214
37.2	195	190	203.837	193.036
37.22	172	184	197.798	187.509
37.24	189	187	192.456	182.751
37.26	174	164	187.919	178.851
37.28	185	185	184.267	175.868
37.3	179	185	181.561	173.844
37.32	197	184	179.851	172.821
37.34	164	158	179.183	172.836
37.36	169	193	179.603	173.936
37.38	202	195	181.165	176.175
37.4	198	179	183.932	179.624
37.42	166	198	187.981	184.366
37.44	199	220	193.404	190.501
37.46	203	198	200.309	198.141
37.48	216	198	208.813	207.415
37.5	205	230	219.045	218.46
37.52	221	269	231.138	231.414
37.54	253	244	245.225	246.414
37.56	290	300	261.428	263.582
37.58	282	312	279.851	283.015
37.6	280	310	300.564	304.771
37.62	344	303	323.584	328.848
37.64	337	337	348.863	355.168
37.66	368	433	376.252	383.517
37.68	418	390	405.479	413.541
37.7	452	432	436.109	444.702
37.72	496	453	467.509	476.235
37.74	483	516	498.825	507.138
37.76	538	504	528.983	536.191
37.78	522	521	556.726	562.033
37.8	569	546	580.717	583.296
37.82	575	576	599.682	598.783
37.84	574	565	612.574	607.631
37.86	550	600	618.71	609.417
37.88	577	524	617.844	604.18
37.9	561	552	610.16	592.36
37.92	547	577	596.201	574.711
37.94	585	531	576.784	552.202
37.96	558	516	552.915	525.94
37.98	477	499	525.706	497.092
38	516	434	496.303	466.804
38.02	434	411	465.809	436.129
38.04	451	394	435.213	405.97
38.06	382	385	405.351	377.048
38.08	387	329	376.879	349.898
38.1	331	313	350.281	324.888
38.12	280	307	325.882	302.246
38.14	317	283	303.882	282.086
38.16	310	290	284.375	264.436
38.18	270	274	267.38	249.264
38.2	310	263	252.859	236.493
38.22	236	218	240.732	226.018
38.24	282	227	230.896	217.716
38.26	245	225	223.229	211.457
38.28	230	237	217.603	207.107
38.3	224	219	213.886	204.536
38.32	231	221	211.946	203.614
38.34	220	212	211.653	204.216
38.36	217	197	212.875	206.213
38.38	215	240	215.475	209.47
38.4	247	233	219.307	213.836
38.42	211	254	224.202	219.137
38.44	254	227	229.965	225.159
38.46	251	226	236.354	231.64
38.48	260	223	243.08	238.262
38.5	283	224	249.797	244.654
38.52	245	269	256.113	250.407
38.54	274	234	261.611	255.107
38.56	256	283	265.888	258.384
38.58	240	244	268.599	259.954
38.6	279	255	269.501	259.653
38.62	257	287	268.477	257.449
38.64	278	237	265.539	253.429
38.66	243	233	260.808	247.776
38.68	230	232	254.495	240.739
38.7	253	208	246.869	232.615
38.72	242	215	238.239	223.721
38.74	214	187	228.928	214.378
38.76	219	215	219.256	204.886
38.78	202	170	209.513	195.508
38.8	210	202	199.951	186.455
38.82	186	203	190.769	177.89
38.84	172	180	182.115	169.924
38.86	205	184	174.09	162.626
38.88	179	179	166.755	156.032
38.9	167	157	160.139	150.154
38.92	161	159	154.251	144.988
38.94	168	137	149.083	140.518
38.96	132	132	144.617	136.725
38.98	142	112	140.834	133.591
39	131	109	137.715	131.101
39.02	126	144	135.248	129.251
39.04	147	143	133.428	128.041
39.06	129	136	132.262	127.476
39.08	136	126	131.756	127.549
39.1	133	132	131.903	128.217
39.12	126	127	132.643	129.352
39.14	131	132	133.812	130.702
39.16	141	134	135.11	131.893
39.18	117	129	136.125	132.522
39.2	144	134	136.462	132.32
39.22	137	132	135.925	131.277
39.24	133	115	134.59	129.59
39.26	147	135	132.697	127.482
39.28	129	118	130.455	125.08
39.3	123	115	127.954	122.431
39.32	114	138	125.233	119.601
39.34	130	114	122.378	116.725
39.36	128	114	119.544	113.958
39.38	125	113	116.891	111.429
39.4	106	107	114.522	109.224
39.42	118	114	112.47	107.359
39.44	105	126	110.72	105.777
39.46	108	105	109.233	104.432
39.48	101	101	107.965	103.284
39.5	100	97	106.875	102.296
39.52	112	104	105.923	101.44
39.54	106	114	105.074	100.69
39.56	87	101	104.3	100.029
39.58	99	114	103.61	99.4417
39.6	101	94	103.022	98.9161
39.62	112	100	102.506	98.4422
39.64	105	93	102.039	98.0119
39.66	100	120	101.615	97.6191
39.68	112	85	101.226	97.2587
39.7	101	87	100.868	96.9266
39.72	105	114	100.537	96.6193
39.74	103	113	100.231	96.3339
39.76	106	96	99.945	96.0681
39.78	99	102	99.6786	95.8199
39.8	118	100	99.4295	95.5876
39.82	89	107	99.1961	95.3697
39.84	99	93	98.9768	95.1649
39.86	104	81	98.7702	94.9723
39.88	97	105	98.5742	94.7906
39.9	99	86	98.3873	94.6184
39.92	83	90	98.2103	94.4542
39.94	88	87	98.046	94.2974
39.96	97	82	97.8918	94.1504
39.98	82	85	97.7462	94.0141
40	98	93	97.6086	93.8859
40.02	102	101	97.4786	93.7648
40.04	106	94	97.3559	93.6507
40.06	93	110	97.2401	93.5435
40.08	104	107	97.131	93.4428
40.1	100	84	97.0285	93.348
40.12	101	80	96.9327	93.2588
40.14	103	94	96.8431	93.1753
40.16	107	94	96.7591	93.0973
40.18	103	94	96.6804	93.025
40.2	103	99	96.6075	92.9581
40.22	110	101	96.5402	92.8966
40.24	92	91	96.4785	92.8405
40.26	87	90	96.4225	92.7899
40.28	104	67	96.3722	92.7446
40.3	116	93	96.3275	92.7049
40.32	101	94	96.2888	92.6709
40.34	93	109	96.256	92.6426
40.36	106	77	96.2294	92.6203
40.38	103	103	96.2091	92.6042
40.4	93	107	96.1955	92.5945
40.42	95	97	96.1887	92.5915
40.44	101	85	96.1893	92.5956
40.46	72	97	96.1975	92.6072
40.48	107	92	96.2138	92.6269
40.5	93	92	96.2384	92.6551
40.52	111	78	96.2712	92.6926
40.54	100	89	96.3122	92.7399
40.56	94	86	96.3639	92.7974
40.58	103	107	96.4309	92.8653
40.6	80	90	96.5124	92.945
40.62	82	87	96.609	93.0409
40.64	95	82	96.7224	93.157
40.66	105	87	96.8559	93.2959
40.68	103	80	97.0153	93.4637
40.7	103	108	97.2067	93.6599
40.72	90	99	97.4266	93.8744
40.74	96	89	97.6666	94.117
40.76	109	99	97.9414	94.3971
40.78	103	91	98.2596	94.722
40.8	101	95	98.6292	95.0996
40.82	85	101	99.0594	95.5389
40.84	89	89	99.5604	96.0498
40.86	101	95	100.144	96.6431
40.88	94	90	100.821	97.3298
40.9	105	103	101.604	98.1216
40.92	114	87	102.506	99.0329
40.94	121	111	103.542	100.084
40.96	98	97	104.737	101.303
40.98	99	100	106.123	102.733
41	103	93	107.751	104.431
41.02	85	107	109.685	106.473
41.04	113	114	112.013	108.955
41.06	114	117	114.847	112
41.08	108	133	118.329	115.75
41.1	126	123	122.633	120.365
41.12	129	124	127.949	125.99
41.14	158	136	134.446	132.701
41.16	136	158	142.189	140.401
41.18	146	153	150.985	148.689
41.2	165	169	160.215	156.766
41.22	153	202	168.762	163.53
41.24	192	177	175.26	167.932
41.26	173	170	178.662	169.459
41.28	180	172	178.803	168.355
41.3	201	178	176.376	165.341
41.32	180	155	172.332	161.083
41.34	159	147	167.252	155.897
41.36	156	136	161.259	149.877
41.38	132	149	154.392	143.2
41.4	145	148	146.942	136.261
41.42	151	117	139.447	129.548
41.44	131	108	132.447	123.451
41.46	127	115	126.278	118.165
41.48	116	110	121.05	113.717
41.5	101	90	116.715	110.038
41.52	131	100	113.159	107.021
41.54	100	100	110.252	104.549
41.56	110	95	107.864	102.505
41.58	106	116	105.878	100.807
41.6	128	86	104.221	99.3909
41.62	90	92	102.83	98.2015
41.64	92	107	101.655	97.1963
41.66	107	94	100.657	96.3408
41.68	92	75	99.8042	95.6078
41.7	105	78	99.0702	94.9753
41.72	102	85	98.4343	94.4257
41.74	110	114	97.88	93.945
41.76	95	102	97.3937	93.5219
41.78	91	88	96.9644	93.1474
41.8	91	96	96.5835	92.8141
41.82	95	91	96.2438	92.5161
41.84	103	84	95.9394	92.2484
41.86	104	100	95.6654	92.0069
41.88	103	83	95.4177	91.7882
41.9	96	86	95.193	91.5894
41.92	91	74	94.9885	91.4082
41.94	101	86	94.8017	91.2423
41.96	110	91	94.6305	91.0902
41.98	88	92	94.4733	90.9502
42	99	100	94.3284	90.8211
42.02	95	76	94.1946	90.7018
42.04	90	112	94.0707	90.5912
42.06	89	97	93.9558	90.4886
42.08	106	86	93.849	90.3931
42.1	90	82	93.7495	90.304
42.12	88	97	93.6567	90.2209
42.14	86	86	93.5699	90.1432
42.16	97	87	93.4887	90.0704
42.18	87	92	93.4125	90.0021
42.2	100	97	93.341	89.9379
42.22	89	93	93.2738	89.8776
42.24	95	108	93.2105	89.8208
42.26	110	80	93.1509	89.7675
42.28	82	86	93.0946	89.7179
42.3	98	85	93.0415	89.6724
42.32	79	92	92.9914	89.6319
42.34	83	76	92.9443	89.5981
42.36	75	92	92.9015	89.5666
42.38	96	96	92.8656	89.5305
42.4	82	100	92.8358	89.495
42.42	93	82	92.8033	89.461
42.44	78	91	92.7697	89.4288
42.46	85	71	92.7366	89.3983
42.48	107	112	92.7046	89.3693
42.5	87	84	92.6742	89.342
42.52	94	86	92.6453	89.3161
42.54	108	85	92.618	89.2916
42.56	76	93	92.592	89.2684
42.58	94	78	92.5672	89.2465
42.6	82	89	92.5423	89.2258
42.62	89	88	92.5168	89.2063
42.64	93	106	92.4922	89.1877
42.66	82	84	92.4719	89.1695
42.68	89	97	92.4539	89.1506
42.7	115	88	92.4371	89.1315
42.72	101	86	92.4216	89.1162
42.74	93	86	92.4071	89.108
42.76	78	91	92.3938	89.1027
42.78	99	90	92.3816	89.0939
42.8	102	66	92.3705	89.0845
42.82	103	84	92.3605	89.0754
42.84	103	87	92.3518	89.066
42.86	91	82	92.3452	89.0563
42.88	95	97	92.3426	89.0477
42.9	90	106	92.3424	89.0424
42.92	98	100	92.3378	89.0384
42.94	83	77	92.3337	89.0355
42.96	99	95	92.3317	89.0337
42.98	86	111	92.3309	89.0329
43	75	75	92.3313	89.0332
43.02	112	100	92.333	89.0346
43.04	115	87	92.3358	89.0372
43.06	82	102	92.3399	89.0409
43.08	107	74	92.3452	89.0457
43.1	88	83	92.3521	89.0515
43.12	93	85	92.3611	89.0587
43.14	114	73	92.3717	89.0679
43.16	80	84	92.3841	89.0788
43.18	124	80	92.3984	89.0913
43.2	90	101	92.4148	89.1057
43.22	80	101	92.4333	89.1227
43.24	87	75	92.4541	89.1437
43.26	76	90	92.4775	89.1696
43.28	88	93	92.5036	89.1972
43.3	104	104	92.5327	89.2253
43.32	78	90	92.5653	89.2591
43.34	87	96	92.6027	89.2995
43.36	104	103	92.6482	89.3404
43.38	94	82	92.7046	89.3807
43.4	95	108	92.7668	89.4244
43.42	94	94	92.8268	89.4728
43.44	82	85	92.8889	89.5265
43.46	91	81	92.957	89.5865
43.48	86	97	93.0327	89.6535
43.5	84	94	93.1174	89.7287
43.52	100	97	93.2125	89.8133
43.54	100	87	93.3196	89.9089
43.56	90	110	93.4407	90.0173
43.58	84	96	93.5782	90.1408
43.6	91	94	93.7351	90.282
43.62	89	98	93.9147	90.4438
43.64	117	87	94.121	90.6297
43.66	85	102	94.3583	90.8432
43.68	116	82	94.6312	91.0881
43.7	96	97	94.944	91.3684
43.72	115	92	95.3017	91.6885
43.74	99	82	95.7101	92.054
43.76	99	83	96.1778	92.4722
43.78	94	100	96.716	92.9565
43.8	107	106	97.3401	93.5319
43.82	109	105	98.0751	94.2296
43.84	92	92	98.9599	95.0764
43.86	93	89	100.037	96.1125
43.88	101	96	101.353	97.3827
43.9	98	120	102.973	98.9375
43.92	98	103	104.965	100.823
43.94	102	107	107.394	103.062
43.96	111	121	110.287	105.62
43.98	109	119	113.586	108.364
44	124	95	117.084	111.029
44.02	128	137	120.387	113.257
44.04	100	141	122.991	114.705
44.06	131	118	124.476	115.212
44.08	123	106	124.727	114.869
44.1	117	113	123.976	113.933
44.12	134	134	122.609	112.644
44.14	113	111	120.904	111.109
44.16	106	107	118.928	109.327
44.18	128	92	116.64	107.303
44.2	127	117	114.05	105.12
44.22	98	103	111.298	102.924
44.24	109	94	108.59	100.865
44.26	111	101	106.105	99.0369
44.28	100	103	103.941	97.4749
44.3	106	92	102.118	96.1706
44.32	89	95	100.61	95.0948
44.34	94	85	99.3719	94.2113
44.36	91	75	98.3563	93.4855
44.38	105	87	97.52	92.887
44.4	97	89	96.8276	92.391
44.42	90	80	96.2509	91.9778
44.44	91	87	95.7679	91.6318
44.46	101	95	95.3613	91.3405
44.48	85	94	95.0173	91.094
44.5	117	89	94.725	90.8841
44.52	95	75	94.4751	90.7044
44.54	87	75	94.2605	90.549
44.56	83	91	94.0748	90.4133
44.58	92	88	93.9126	90.2949
44.6	80	89	93.7701	90.194
44.62	80	80	93.6458	90.1068
44.64	93	96	93.539	90.0309
44.66	96	92	93.4457	89.9646
44.68	93	97	93.364	89.9061
44.7	107	89	93.2922	89.8528
44.72	94	86	93.229	89.8015
44.74	113	83	93.1728	89.7529
44.76	104	96	93.1205	89.7142
44.78	79	95	93.0692	89.6856
44.8	93	97	93.0216	89.662
44.82	104	99	92.9861	89.6423
44.84	105	93	92.9587	89.6261
44.86	101	87	92.9358	89.6132
44.88	96	92	92.9167	89.6032
44.9	104	104	92.901	89.5959
44.92	112	84	92.8885	89.5911
44.94	106	83	92.879	89.5888
44.96	89	92	92.8722	89.5886
44.98	86	80	92.868	89.5906
45	89	73	92.8663	89.5945
45.02	90	80	92.8668	89.6003
45.04	106	90	92.8694	89.6079
45.06	84	100	92.8741	89.6172
45.08	70	112	92.8808	89.6281
45.1	86	89	92.8893	89.6406
45.12	104	104	92.8994	89.6546
45.14	111	98	92.9107	89.6701
45.16	102	93	92.9226	89.6866
45.18	65	94	92.9357	89.7037
45.2	103	85	92.952	89.7215
45.22	92	92	92.9704	89.7412
45.24	81	88	92.9903	89.7635
45.26	97	88	93.0118	89.7873
45.28	88	87	93.0347	89.8129
45.3	98	92	93.0591	89.8406
45.32	96	93	93.0849	89.8702
45.34	81	87	93.1121	89.8997
45.36	83	81	93.1408	89.9302
45.38	118	82	93.1711	89.9619
45.4	65	89	93.2032	89.9949
45.42	77	94	93.2377	90.0292
45.44	109	97	93.2737	90.0649
45.46	91	84	93.3099	90.1019
45.48	89	96	93.3473	90.14
45.5	90	95	93.3861	90.1786
45.52	91	80	93.4263	90.2171
45.54	103	74	93.4676	90.2567
45.56	84	88	93.5092	90.3001
45.58	87	94	93.551	90.3457
45.6	94	98	93.5949	90.393
45.62	110	86	93.6427	90.4418
45.64	93	103	93.6926	90.4923
45.66	96	80	93.7442	90.5444
45.68	90	82	93.7975	90.5982
45.7	103	86	93.8526	90.6537
45.72	96	92	93.9096	90.711
45.74	110	88	93.9684	90.7702
45.76	109	86	94.0291	90.8312
45.78	112	87	94.0918	90.8942
45.8	99	82	94.1562	90.9591
45.82	104	82	94.2219	91.0261
45.84	115	83	94.2885	91.0949
45.86	95	100	94.3572	91.165
45.88	85	91	94.4301	91.2364
45.9	119	91	94.506	91.3104
45.92	92	102	94.5845	91.388
45.94	95	88	94.6655	91.4689
45.96	89	77	94.7492	91.5524
45.98	100	87	94.8355	91.6386
46	87	84	94.9246	91.7276
46.02	103	97	95.0166	91.8195
46.04	89	85	95.1116	91.9143
46.06	111	90	95.2092	92.0122
46.08	96	85	95.3088	92.1134
46.1	93	83	95.4096	92.2179
46.12	108	92	95.5136	92.326
46.14	105	99	95.6244	92.4388
46.16	127	109	95.7403	92.5582
46.18	95	95	95.8623	92.6837
46.2	93	81	95.9935	92.809
46.22	107	92	96.132	92.9348
46.24	92	86	96.2675	93.0666
46.26	88	88	96.4051	93.2033
46.28	73	102	96.547	93.3448
46.3	108	103	96.6938	93.4913
46.32	94	98	96.8458	93.643
46.34	95	92	97.0033	93.8001
46.36	114	102	97.1664	93.963
46.38	87	93	97.3355	94.1318
46.4	105	80	97.5109	94.3069
46.42	94	88	97.6927	94.4885
46.44	107	76	97.8813	94.677
46.46	85	88	98.0771	94.8726
46.48	89	96	98.2804	95.0759
46.5	113	112	98.4916	95.287
46.52	104	88	98.711	95.5065
46.54	95	112	98.9391	95.7347
46.56	134	85	99.1763	95.9721
46.58	114	76	99.4232	96.2192
46.6	102	84	99.6801	96.4765
46.62	116	107	99.9476	96.7446
46.64	102	103	100.226	97.024
46.66	112	89	100.517	97.3153
46.68	94	103	100.82	97.6193
46.7	88	109	101.137	97.9367
46.72	120	108	101.467	98.2682
46.74	126	96	101.812	98.6147
46.76	108	105	102.173	98.9771
46.78	90	103	102.55	99.3563
46.8	99	107	102.945	99.7533
46.82	106	91	103.358	100.169
46.84	100	113	103.791	100.605
46.86	84	99	104.246	101.063
46.88	112	99	104.723	101.543
46.9	98	104	105.223	102.048
46.92	113	112	105.75	102.579
46.94	119	104	106.303	103.138
46.96	121	111	106.886	103.726
46.98	119	96	107.499	104.347
47	106	112	108.147	105.002
47.02	114	96	108.83	105.696
47.04	113	113	109.553	106.434
47.06	101	113	110.321	107.216
47.08	122	97	111.138	108.036
47.1	96	103	112.001	108.903
47.12	110	122	112.91	109.826
47.14	102	109	113.874	110.808
47.16	102	136	114.898	111.854
47.18	101	117	115.991	112.972
47.2	118	109	117.159	114.169
47.22	114	109	118.409	115.454
47.24	117	118	119.753	116.828
47.26	117	135	121.198	118.301
47.28	103	125	122.748	119.887
47.3	132	107	124.415	121.601
47.32	132	138	126.218	123.46
47.34	126	111	128.174	125.484
47.36	146	127	130.304	127.691
47.38	144	144	132.632	130.104
47.4	140	138	135.187	132.757
47.42	136	142	138.005	135.687
47.44	144	140	141.126	138.938
47.46	142	149	144.594	142.563
47.48	159	152	148.465	146.622
47.5	164	154	152.81	151.189
47.52	162	162	157.708	156.349
47.54	161	165	163.251	162.199
47.56	177	178	169.545	168.851
47.58	191	167	176.71	176.428
47.6	176	176	184.879	185.071
47.62	224	173	194.201	194.93
47.64	216	213	204.835	206.169
47.66	225	235	216.949	218.957
47.68	232	242	230.72	233.468
47.7	268	252	246.323	249.874
47.72	270	301	263.932	268.343
47.74	271	263	283.711	289.025
47.76	288	321	305.806	312.052
47.78	344	370	330.334	337.517
47.8	357	354	357.37	365.467
47.82	397	391	386.938	395.882
47.84	435	418	418.981	428.651
47.86	422	437	453.346	463.543
47.88	478	495	489.747	500.179
47.9	550	573	527.733	537.987
47.92	553	592	566.655	576.181
47.94	635	637	605.638	613.743
47.96	616	647	643.581	649.443
47.98	642	700	679.187	681.906
48	759	714	711.05	709.737
48.02	777	718	737.785	731.679
48.04	800	765	758.191	746.774
48.06	842	807	771.398	754.453
48.08	769	779	776.954	754.577
48.1	802	736	774.841	747.383
48.12	812	801	765.404	733.385
48.14	761	721	749.223	713.284
48.16	693	687	727.041	687.912
48.18	756	676	699.728	658.184
48.2	669	627	668.241	625.092
48.22	663	642	633.601	589.669
48.24	635	571	596.865	552.946
48.26	574	528	559.068	515.888
48.28	545	505	521.164	479.344
48.3	468	427	483.975	444.007
48.32	505	387	448.165	410.405
48.34	408	385	414.225	378.903
48.36	409	342	382.493	349.728
48.38	341	313	353.167	322.989
48.4	309	285	326.336	298.703
48.42	313	290	302.002	276.817
48.44	288	269	280.1	257.231
48.46	251	216	260.518	239.806
48.48	252	238	243.112	224.383
48.5	220	249	227.716	210.788
48.52	208	185	214.155	198.845
48.54	198	180	202.246	188.378
48.56	172	181	191.813	179.217
48.58	187	166	182.683	171.203
48.6	178	168	174.697	164.187
48.62	161	161	167.705	158.036
48.64	178	167	161.574	152.631
48.66	157	133	156.184	147.865
48.68	158	134	151.428	143.644
48.7	149	151	147.215	139.889
48.72	128	143	143.466	136.533
48.74	147	137	140.114	133.518
48.76	138	122	137.102	130.796
48.78	126	125	134.38	128.326
48.8	146	123	131.91	126.074
48.82	112	136	129.657	124.011
48.84	130	106	127.593	122.114
48.86	127	141	125.696	120.366
48.88	116	116	123.946	118.749
48.9	112	115	122.322	117.248
48.92	140	110	120.813	115.852
48.94	126	113	119.411	114.549
48.96	132	96	118.102	113.332
48.98	118	104	116.879	112.192
49	107	117	115.733	111.124
49.02	97	121	114.658	110.12
49.04	112	139	113.648	109.176
49.06	124	103	112.698	108.287
49.08	124	102	111.802	107.449
49.1	114	109	110.958	106.659
49.12	127	95	110.161	105.911
49.14	109	116	109.408	105.204
49.16	116	91	108.696	104.535
49.18	125	85	108.021	103.901
49.2	112	101	107.382	103.3
49.22	108	93	106.775	102.73
49.24	105	105	106.199	102.187
49.26	109	107	105.652	101.672
49.28	84	99	105.132	101.182
49.3	110	112	104.637	100.715
49.32	103	88	104.165	100.27
49.34	114	113	103.716	99.8456
49.36	107	91	103.287	99.4409
49.38	120	103	102.878	99.0546
49.4	124	97	102.487	98.6854
49.42	105	89	102.115	98.3324
49.44	122	90	101.758	97.9946
49.46	98	76	101.418	97.6719
49.48	105	91	101.091	97.3642
49.5	114	79	100.779	97.0696
49.52	115	103	100.48	96.7864
49.54	103	92	100.194	96.5151
49.56	94	104	99.9195	96.2554
49.58	100	94	99.6574	96.0059
49.6	99	74	99.4056	95.7664
49.62	85	80	99.1631	95.5382
49.64	102	102	98.9307	95.3215
49.66	97	103	98.7089	95.1128
49.68	120	84	98.4978	94.9087
49.7	93	90	98.2967	94.7117
49.72	109	95	98.101	94.522
49.74	102	98	97.91	94.3393
49.76	89	93	97.7257	94.1634
49.78	107	99	97.5481	93.9941
49.8	87	90	97.3771	93.8309
49.82	120	86	97.2124	93.6737
49.84	90	112	97.0537	93.5222
49.86	84	87	96.9008	93.3761
49.88	119	88	96.7535	93.2353
49.9	99	97	96.6114	93.0994
49.92	87	96	96.4744	92.9684
49.94	98	118	96.3423	92.8419
[truncated: 1,503 more rows]
[truncated: 11 more columns]

## Sheet: Fig.4-BET
TiO2-P25		TiO2-400°C
P/P0	cm3g-1	P/P0	cm3g-1
0.0239614	10.1894	0.0261163	9.865
0.0535116	11.2688	0.0531486	10.858
0.0754407	11.8879	0.0734613	11.5451
0.100107	12.5376	0.0989016	12.2148
0.125109	13.175	0.124298	12.8384
0.150166	13.7978	0.149461	13.4342
0.175129	14.4134	0.174575	14.0122
0.200163	15.0237	0.199703	14.575
0.224934	15.6491	0.224669	15.1337
0.25001	16.2565	0.249646	15.6851
0.276881	17.4122	0.276497	16.7253
0.300084	18.0039	0.29969	17.2683
0.324882	18.6202	0.324447	17.8304
0.349957	19.2242	0.349448	18.3862
0.374943	19.824	0.374269	18.9533
0.399873	20.4281	0.399084	19.5276
0.424657	21.0485	0.423925	20.1058
0.449572	21.6691	0.448945	20.6705
0.4745	22.2895	0.474097	21.2202
0.499322	22.9283	0.498817	21.7941
0.524028	23.5932	0.523489	22.3922
0.548764	24.2779	0.548158	23.0168
0.573373	24.9936	0.578736	23.8446
0.60397	25.9376	0.599069	24.3798
0.624057	26.5845	0.627797	25.2634
0.653036	27.5916	0.647992	25.8893
0.678652	28.5623	0.675449	26.8077
0.703416	29.5432	0.700209	27.7406
0.727683	30.6019	0.724573	28.7416
0.750094	31.6752	0.748595	29.8417
0.773838	32.9534	0.774699	32.3281
0.80238	34.7297	0.800813	33.9806
0.826885	36.5091	0.824722	35.7107
0.850215	38.5336	0.851046	38.0345
0.874724	41.255	0.873888	40.4652
0.900533	45.1465	0.900449	44.3374
0.924189	52.7946	0.924077	49.6997
0.949336	62.2425	0.948189	59.4273
0.973201	83.0628	0.972938	88.2388
0.99278	149.996	0.993561	302.399

## Sheet: Fig.5 and 6- Discoloration
	Photocatalysis (TiO2 glass spheres) -Cycle 1				Photolysis				Without catalyst and light
	Time (min)	Absorbance	Discoloration (%)		Time (min)	Absorbance	Discoloration (%)		Time (min)	Absorbance	Discoloration (%)
	-30	1.057	0		0	1.101	0		0	1.117	0
	-15	1.046	1.04068		30	1.022	7.1753		60	1.086	2.77529
	0	1.031	2.45979		60	0.961	12.7157		90	1.101	1.43241
	15	0.582	43.55		90	0.893	18.8919
	30	0.368	64.3065
	45	0.222	78.4675
	60	0.125	87.8758
	75	0.071	93.1135
	90	0.039	96.2173
	Cycle 2
	Time (min)	Absorbance	Discoloration (%)
	0	1.053	0
	30	0.433	58.8794
	45	0.282	73.2194
	90	0.071	93.2574
	Cycle 3
	Time (min)	Absorbance	Discoloration (%)
	0	1.019	0
	30	0.481	52.7969
	45	0.336	67.0265
	90	0.104	89.7939
	Cycle 4
	Time (min)	Absorbance	Discoloration (%)
	0	1.032	0
	30	0.558	45.9302
	45	0.408	60.4651
	90	0.163	84.2054
	Cycle 5 - after regeneration process
	Time (min)	Absorbance	Discoloration (%)
	0	0.945	0
	30	0.314	66.7725
	45	0.201	78.7302
	90	0.032	96.6138

## Sheet: Table 2
		Cycle 1	Cycle 2	Cycle 3	Cycle 4	Cycle 5
	Time(min)	C/Co	C/Co	C/Co	C/Co	C/Co
	0	1	1	1	1	1
	15	0.5645
	30	0.356935	0.41	0.47	0.54	0.33
	45	0.215325	0.267806	0.329735	0.395349	0.21
	60	0.121242
	75	0.0688652
	90	0.0378274	0.0674264	0.102061	0.157946	0.03
	Time(min)	ln(C/Co)	ln(C/Co)	ln(C/Co)	ln(C/Co)	ln(C/Co)
	0	0	0	0	0	0
	15	-0.571814
	30	-1.0302	-0.891598	-0.755023	-0.616186	-1.10866
	45	-1.53561	-1.31749	-1.10947	-0.927987	-1.56065
	60	-2.10997
	75	-2.6756
	90	-3.27472	-2.69672	-2.28219	-1.8455	-3.50656
		Cycle 1	Cycle 2	Cycle 3	Cycle 4	Cycle 5
	k (min-1)	0.036	0.03	0.025	0.02	0.039
